# Supplementary material
Source: PubMed Central journal article supplement (PMC1240114)
Supplement: nar_33_17_5602__1.pdf [file nar_33_17_5602__1.pdf]

## Supplementary Data

### Characterization of small molecule ligands.

**Compound 2G:**  $R_f = 0.15$  (10% CH<sub>3</sub>OH in dichloromethane); <sup>1</sup>H NMR (400 MHz CDCl<sub>3</sub>) (mixture of rotamers)  $\delta$  0.94 (t, 3H,  $J = 6.5$  Hz), 1.18-1.38 (m, 2H), 1.46-2.36 (m, 8H), 2.38-2.58 (m, 2H), 2.95 (m, 2H), 3.50-3.68 (m, 5H), 3.71 (s, 6H), 3.79 (s, 3H), 3.80 (s, 3H), 3.81 (s, 3H), 4.36-4.48 (m, 2H), 5.40 (m, 1H), 5.50-5.60 (m, 1H), 6.41 (s, 2H), 6.58-7.20 (m, 7H), 7.56 (br, 1H); ES<sup>+</sup> HRMS calcd for C<sub>45</sub>H<sub>55</sub>N<sub>7</sub>O<sub>11</sub> (M + H<sup>+</sup>) 870.4038, found 870.3992.

**Compound 4G:**  $R_f = 0.15$  (10% CH<sub>3</sub>OH in dichloromethane); <sup>1</sup>H NMR (400 MHz CDCl<sub>3</sub>) (mixture of rotamers)  $\delta$  0.90 (t, 3H,  $J = 7.0$  Hz), 1.28-1.46 (m, 2H), 1.52-1.75 (m, 10H), 2.00-2.31 (m, 2H), 2.40-2.60 (m, 2H), 2.86 (m, 2H), 3.26-3.64 (m, 5H), 3.68 (s, 6H), 3.79 (s, 3H), 3.82 (s, 3H), 3.83 (s, 3H), 4.51-4.80 (m, 2H), 5.43 (m, 1H), 5.59-5.62 (m, 1H), 6.39 (s, 2H), 6.58-7.20 (m, 7H), 7.38 (br, 1H); ES<sup>+</sup> HRMS calcd for C<sub>47</sub>H<sub>59</sub>N<sub>7</sub>O<sub>11</sub> (M + H<sup>+</sup>) 898.4351, found 898.4318.

**Compound 8G:**  $R_f = 0.13$  (10% CH<sub>3</sub>OH in dichloromethane); <sup>1</sup>H NMR (400 MHz CDCl<sub>3</sub>) (mixture of rotamers)  $\delta$  0.90 (t, 3H,  $J = 7.5$  Hz), 1.22-1.46 (m, 2H), 1.52-1.76 (m, 4H), 1.88-2.36 (m, 4H), 2.40-2.62 (m, 2H), 2.81 (m, 2H), 3.50-3.66 (m, 13H), 3.68 (s, 6H), 3.80 (s, 3H), 3.83 (s, 3H), 3.85 (s, 3H), 4.48-4.66 (m, 2H), 5.45 (m, 1H), 5.56-5.65 (m, 1H), 6.41 (s, 2H), 6.60-7.20 (m, 7H), 7.46 (s, 1H); ES<sup>+</sup> HRMS calcd for C<sub>49</sub>H<sub>63</sub>N<sub>7</sub>O<sub>13</sub> (M + H<sup>+</sup>) 958.4562, found 958.4563.

**Compound 2A:**  $R_f = 0.15$  (10% CH<sub>3</sub>OH in dichloromethane); <sup>1</sup>H NMR (400 MHz CDCl<sub>3</sub>) (mixture of rotamers)  $\delta$  0.91 (t, 3H,  $J = 6.8$  Hz), 1.24-1.50 (m, 2H), 1.60-1.80 (m, 4H), 1.86-2.14 (m, 4H), 2.32-2.60 (m, 2H), 2.88 (m, 2H), 3.60-3.70 (m, 5H), 3.71 (s, 6H), 3.79 (s, 3H), 3.83 (s, 3H), 3.84 (s, 3H), 4.38-4.46 (m, 2H), 5.55 (m, 1H), 5.60-5.65 (m, 1H), 6.43 (s, 2H), 6.58-7.10 (m, 7H) 7.80 (s, 1H), 8.28 (s, 1H).; ES<sup>+</sup> MS calcd for C<sub>45</sub>H<sub>55</sub>N<sub>7</sub>O<sub>10</sub> (M + H<sup>+</sup>) 854.40, found 854.50.
