# Supplementary material
Source: PubMed Central journal article supplement (PMC1240114)
Supplement: nar_33_17_5602__3.pdf [file nar_33_17_5602__3.pdf]

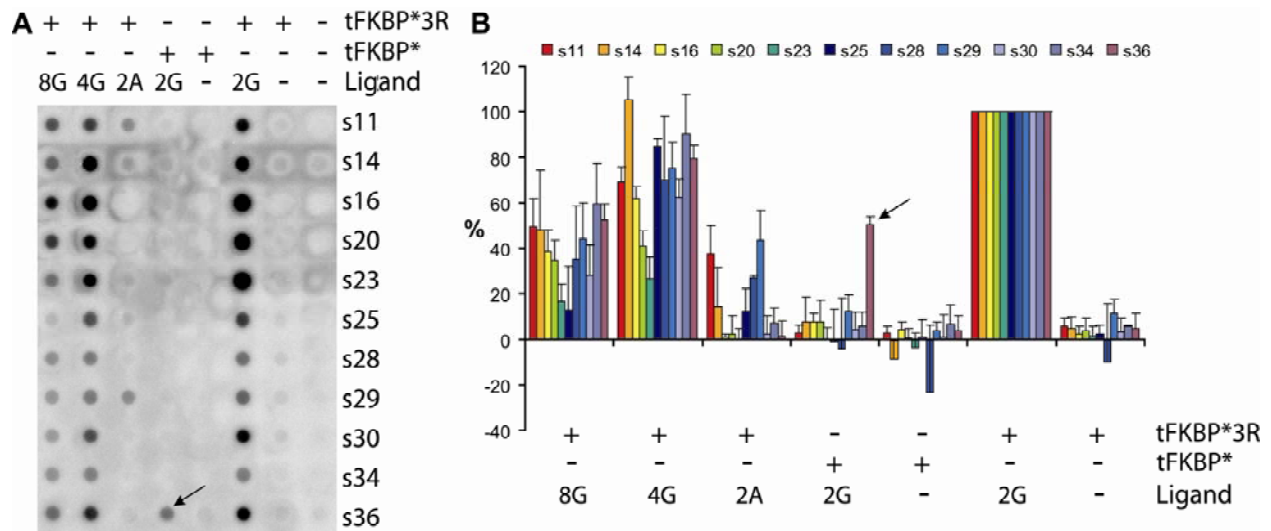

**Supplementary Figure 2.** Specificity of high-affinity aptamers for tFKBP\*3R and 2G. Nitrocellulose filter-binding experiments were used to determine whether structurally similar small molecules would induce protein-small molecule-RNA complex formation as efficiently as 2G. Aptamers were also tested for their ability to differentiate between tFKBP\* and tFKBP\*3R. (A) A representative nitrocellulose filter-binding assay. Note the increased level of tFKBP\*-2G-s36 binding (arrow). (B) Quantification of the data in (A), as a percent of tFKBP\*3R-2G-aptamer binding. Values reflect the average of quadruplicate measurements.
