# Supplementary material
Source: PubMed Central journal article supplement (PMC1240114)
Supplement: nar_33_17_5602__4.pdf [file nar_33_17_5602__4.pdf]

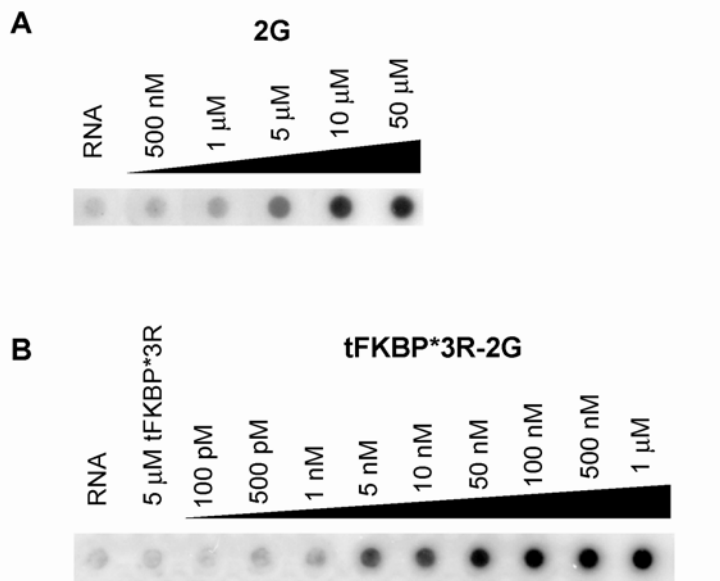

**Supplementary Figure 3** 2G-s23 and tFKBP\*3R-2G-s23  $K_d$  measurements. **(A)** The 2G-s23 affinity was determined by nitrocellulose filter binding assays, and a representative blot is shown. Triplicate measurements indicate a  $K_d$  of  $4.6 \pm 0.8 \mu\text{M}$ . Binding of 2G to one of the point mutant s23 RNA molecules (G72A) that has a greatly diminished capacity to form a ternary complex was also assayed. At  $50 \mu\text{M}$  2G, binding of G72A is barely detectable, and at  $10 \mu\text{M}$  is not detectable, implying that binding of s23 to 2G is specific. **(B)** Representative blot of tFKBP\*3R-2G-s23 binding. The  $K_d$  for ternary complex formation of  $4.3 \pm 0.5 \text{ nM}$  is the average of three independent measurements. Note that no significant binding of s23 to  $5 \mu\text{M}$  tFKBP\*3R can be seen.
