# Supplementary material
Source: PubMed Central journal article supplement (PMC1240114)
Supplement: nar_33_17_5602__5.pdf [file nar_33_17_5602__5.pdf]

**Supplementary Table 1. Estimate of aptamer affinities for tFKBP\*3R-2G**

| <b>Aptamer</b>   | <b><math>K_d</math> (nM)</b> | <b>Sequence of Variable Region</b>                               |
|------------------|------------------------------|------------------------------------------------------------------|
| s4               | 79.6 ± 2.6                   | UACUAUAGGAUGGUCAGGGUCUGACCAACGGUGGGUGGUGAGAGCUAUAGUUGGUGGUC      |
| s5               | 57.2 ± 6.9                   | UUGCAGGCCGGUAUGAACGGUCGGGGGGUUGGUACGCGUCGCGGUAGGCGGGCCGGUCAU     |
| s6               | 314 ± 3                      | GAAAAUUUAAUGCGUUGGUAUUGGUUGGGGAUUGUCAAUUGUUACUCAGGAAUACGUACGGG   |
| s8               | 132 ± 29                     | UCGCGUUAGACGUGGUAAAUGGGACUCGCUCUGAGUUUAGACCUGGGUGGUGCGUUGGCCG    |
| s11              | < 5                          | GAUUUAAGUUAAAGAGGGAGGGUCAUGUGUGCCGGUGUGAUGCGGUACUGAUCCAAG        |
| s14              | < 5                          | UUGGUGUGGGCGUGACUAUCUCGGGUCUUUUGGGGAUAGUAUGGAAUGAUGAUCCUUGUGC    |
| s16              | 10.5 ± 1.9                   | GGUGACUGCGGCGGCGGCGAUUCGCUAUCCCCGGGUAUUAUGCUUCUGGAUCUACUCUGU     |
| s20              | 8.9 ± 4.9                    | UAGAGUGGUGAAGCGGGAUGUGAUUUUCAAGUUCGUUUGGACCAAGAGGCAGAGCCAAC      |
| s23              | < 5                          | UCAUUUCAUUGUGGCGGGUCAGUCAAAUGUGAUGCUUCGUUCAGUGACGGGAGGGUUGUGAG   |
| s25              | < 5                          | AGCGGUGGGUUGCUGAGGCUUUGGAAAGUGUGCAAAGUGCUUUGUGUCGUAUCCGGUGU      |
| s28              | < 5                          | AAGAUGGCGGGUGGAGUAUGGCUUUCGGCGGUAUGCCGUGUGGAGAAGUAUGUUCAGUGGUCCU |
| s29              | < 5                          | AGUAUGCAUCCGGAGUUAGACUCCGAUGGUGGCGAGGGCGUGGUAGACUGGGUGCGAU       |
| s30              | < 5                          | UCACGGAUGCAGAGGACGGAUGGAGCCAGGUGAAAAGGAUUGGCUGAGUAGCUGUGACGA     |
| s34              | < 5                          | AAUGGUGGUAAGUGGGUGGCUGCUUAGGGGCUUGAGAAACGAGUUCCAAGGCAGGUGUGU     |
| s36              | < 5                          | AUUUGAUGUUUUGGUUAUGUCCAGACCGUACCCUACAGUGGUGGCAUGUGGCGNGUGGUUA    |
| s44 <sup>a</sup> | < 5                          | UUCGCGAGCCUAACGUUUAGGAGGGUAUGAAGUAUAUGGUGGAAGGGGACAGUUUCAUA      |

Duplicate nitrocellulose filter binding assays with the 16 RNA aptamers and tFKBP\*3R-2G were quantified and binding affinities were calculated. <sup>a</sup>The  $K_d$  for s44 represents only one measurement.
